# Supplementary material for: A water-stable lanthanide coordination polymer as a multiresponsive luminescent sensor for Fe3+, Cr(vi) and 4-nitrophenol
Source: Royal Society of Chemistry journal article supplement (doi:10.1039/c8dt02202j), 2018-01-01
Supplement: c8dt02202j1.pdf [file c8dt02202j1.pdf]

## Electronic Supplementary information

### **A water-stable lanthanide coordination polymer as multiresponsive luminescence sensor for Fe<sup>3+</sup>, Cr(VI) and 4- nitrophenol**

Yan Liu,<sup>a</sup> Jingjing Ma,<sup>a</sup> Cong Xu,<sup>a</sup> Yang Yang,<sup>a</sup> Minfang Xia,<sup>a</sup> Huie Jiang<sup>a</sup> and Weisheng Liu

<sup>a</sup>Key Laboratory of Nonferrous Metal Chemistry and Resources Utilization of Gansu Province and State Key Laboratory of Applied Organic Chemistry, Key Laboratory of Special unction Materials and Structure Design, Ministry of Education, College of Chemistry and Chemical Engineering, Lanzhou University, Lanzhou, 730000, China.

\* Corresponding authors:

E-mail for W. Liu: liuws@lzu.edu.cn

## Synthesis of isomer of 5-((pyridin-3-yloxy)methyl)isophthalic acid (H<sub>2</sub>L)

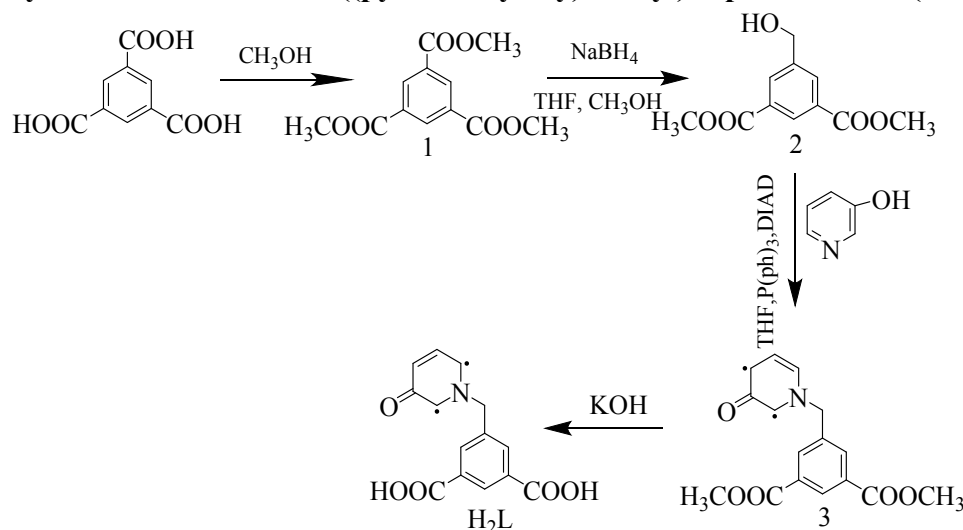

Scheme S1 Synthetic procedure for H<sub>2</sub>L.

### Trimethyl 1,3,5-benzenetricarboxylate (1).

Benzenetricarboxylic acid (10.5 g, 50 mmol) was dissolved in methanol (150 mL). Concentrated sulfuric acid (2 mL) was added. The solution was refluxed for 24 h. Solvent was removed under reduced pressure, the residue was dissolved in chloroform (150 mL) and washed with saturated bicarbonate (200 mL), and the solvent was removed under reduced pressure to give the desired product **1** as a white powder (11 g, 88%).

### Dimethyl 5-hydroxymethylbenzene-1,3-dicarboxylate (2).

Trimethyl-1,3,5-tricarboxybenzoate (12.6 g, 50 mmol) was placed, along with a stirring bar, in a two-neck 250 mL flask equipped with a reflux condenser and a 50 mL addition funnel. While maintaining a dry nitrogen atmosphere, anhydrous THF (40 mL) was added to the reaction flask causing dissolution of the white solid. NaBH<sub>4</sub> (2.3 g, 60 mmol) was then added to this solution thus forming a suspension which was stirred continuously at room temperature. While stirring, a mixture of THF/MeOH (25 mL / 7.4 mL) was added dropwise via the addition funnel. The reaction mixture was then refluxed for 80 min; during this time the reaction mixture changed from a transparent solution to a light yellow and back to transparent again. After cooling, the reaction was quenched with 35 mL of 1 N HCl slowly. The product was then extracted with EtOAc (3 x 35 mL). The organic phase was dried over Na<sub>2</sub>SO<sub>4</sub> and the solvent was removed in vacuo giving white solid of **2** (7.8 g, 69%).

### Dimethyl 5-((pyridin-3-yloxy)methyl)isophthalate (3).

Trihydroxypyridine (2.355 g, 24.78 mmol), triphenylphosphine (6.507 g, 24.807 mmol) and diisopropyl azodicarboxylate (DIAD) (4.884 mL, 25.263 mmol) were added into a 250 mL round bottom flask with 150 mL anhydrous tetrahydrofuran stirred at room temperature for 1 h. Then, the mixed solution turned to orange. **2** (6 g, 26.784 mmol) was added into the mixture. The reactant was stirred for 2 d at room temperature. The solution turned to yellowish. The solution was almost clear despite of some undissolved substance. The solvent was removed under reduced pressure. The crude mixture was purified by silica gel column chromatography with dichloromethane: methanol = 10: 0.1. **3** was obtained with 1.8 g (22%) as yellow solid. <sup>1</sup>H NMR

(DMSO- $d_6$ , 400 MHz, ppm)  $\delta$  8.42 (m, 1H), 8.32 (m, 1H), 7.70 (t, 1H), 7.68 (m, 1H), 7.31(m, 1H), 6.9 (t, 1H), 5.52 (s, 2H), 3.85 (s, 6H) (**Fig. S11**). ESI-MS:  $m/z$  = 301.9  $[M + H]^+$  (**Fig. S13**).

**The isomer of 5-((pyridin-3-yloxy)methyl)isophthalic acid ( $H_2L$ ).**

**3** (3 g, 10 mmol) was dissolved in methanol (90 mL) being clear yellow solution. Aqueous solution of KOH (0.223 g, 1 mL) was added into above mixture, heating at 75 °C for 5 h. After cooling to room temperature, solvent was removed under reduced pressure to give a yellow solid. The solid was dissolved into water (35 mL). Dilute hydrochloric acid was added dropwise to the aqueous with stirring. Lots of yellow particles appeared when the pH value of solution is about 3. Yellow solid  $H_2L$  (2.5 g, 93%) was obtained by filtration.  $^1H$  NMR (DMSO- $d_6$ , 400 MHz, ppm) :  $\delta$  8.80 (s, 1H), 8.67 (s, 1H), 8.48 (s, 1H), 8.38 (t, 1H), 7.93(m, 2H), 5.87 (s, 2H) (**Fig. S12**). ESI-MS:  $m/z$  = 273.9  $[M + H]^+$  (**Fig. S14**).

**Table. S1** Crystal data and structure refinements for **Eu-CP**

| Compound                                                                | Eu-CP                             |
|-------------------------------------------------------------------------|-----------------------------------|
| Empirical formula                                                       | $C_{15}H_{10}EuNO_7 \cdot (H_2O)$ |
| Formula weight                                                          | 486.23                            |
| Crystal system                                                          | Monoclinic                        |
| Space group                                                             | $P2_1/c$                          |
| $a(\text{\AA})$                                                         | 9.5090 (5)                        |
| $b(\text{\AA})$                                                         | 8.4050 (3)                        |
| $c(\text{\AA})$                                                         | 19.1014 (7)                       |
| $\beta(^{\circ})$                                                       | 95.170 (4)                        |
| $V(\text{\AA}^3)$                                                       | 1520.44 (11)                      |
| $T(K)$                                                                  | 293                               |
| $Z$                                                                     | 4                                 |
| $D_{calc}(\text{Mg/m}^3)$                                               | 2.124                             |
| $\mu(\text{Mo K}\alpha), \text{mm}^{-1}$                                | 4.17                              |
| $F_{000}$                                                               | 944.0                             |
| $F_{000}'$                                                              | 943.85                            |
| $h, k, l_{\max}$                                                        | 13, 11, 26                        |
| $T_{\min}, T_{\max}$                                                    | 0.612, 0.716                      |
| $T_{\min}'$                                                             | 0.600                             |
| $S$                                                                     | 1.09                              |
| $R_1, wR_2[I > 2\sigma(I)]$                                             | 0.0381, 0.0700                    |
| CCDC number                                                             | 1812540                           |
| $w = 1/[\sigma^2(F_o^2) + (0.078P)^2]$ , where $P = (F_o^2 + 2F_c^2)/3$ |                                   |

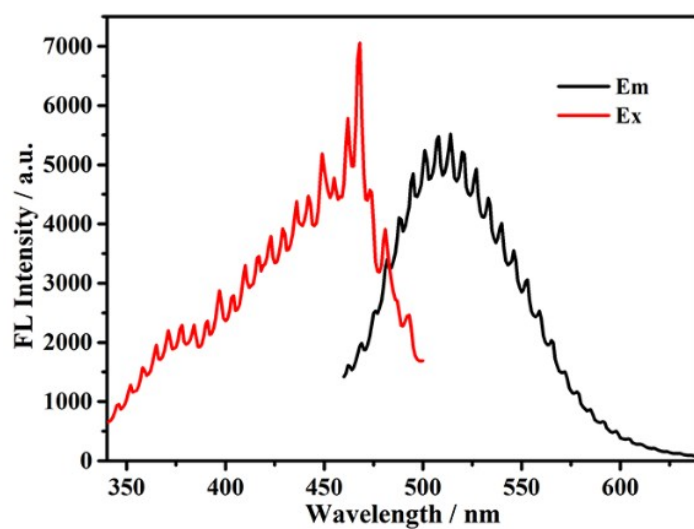

Fig. S1 Solid-state emission spectra of  $\text{H}_2\text{L}$  at room temperature ( $\lambda_{\text{ex}} = 450 \text{ nm}$ )

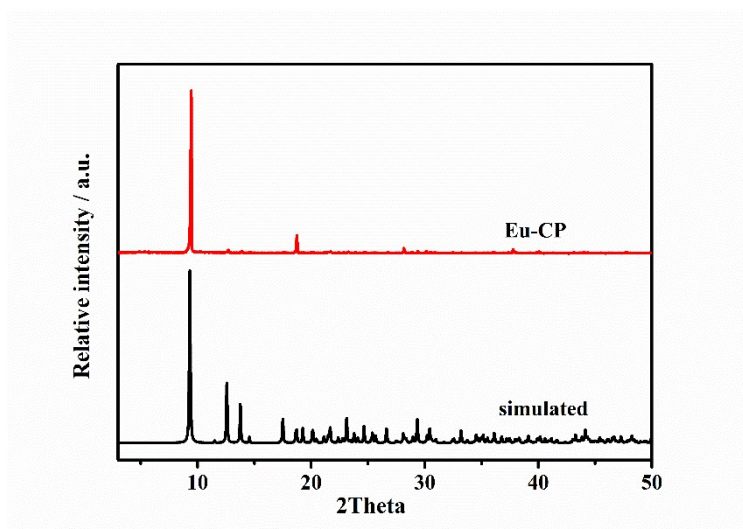

Fig. S2 PXRD patterns of Eu-CP

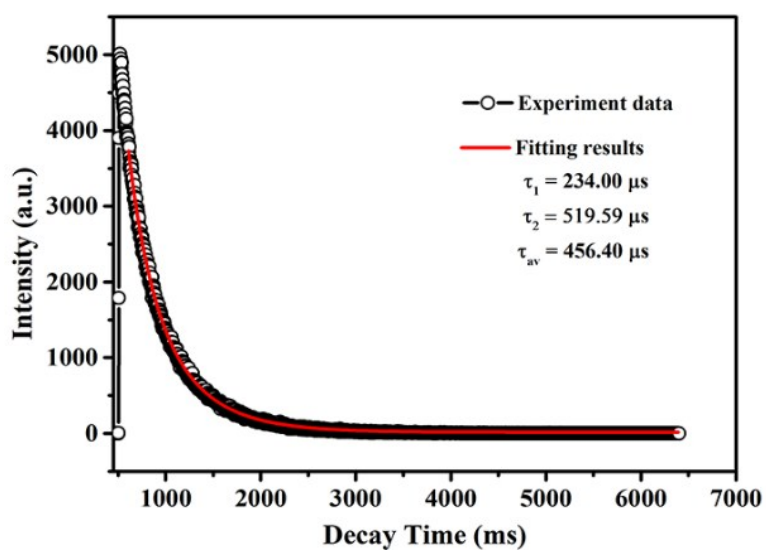

Fig. S3 Decay time of Eu-CP

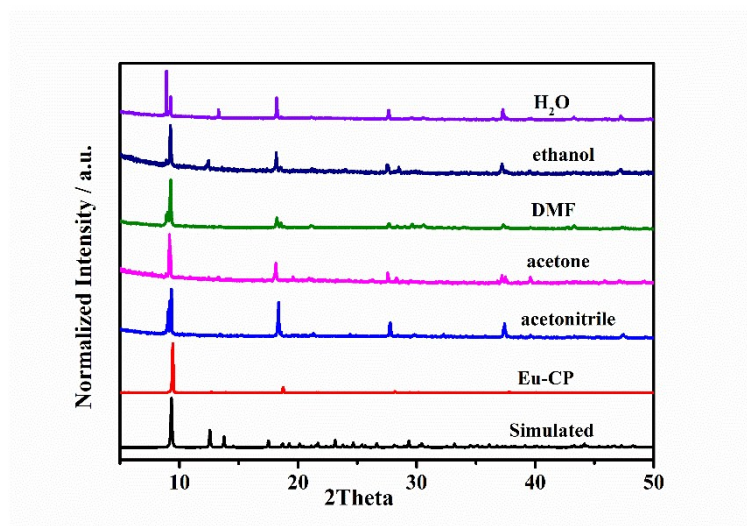

Fig. S4 PXRD patterns of Eu-CP in different solvents

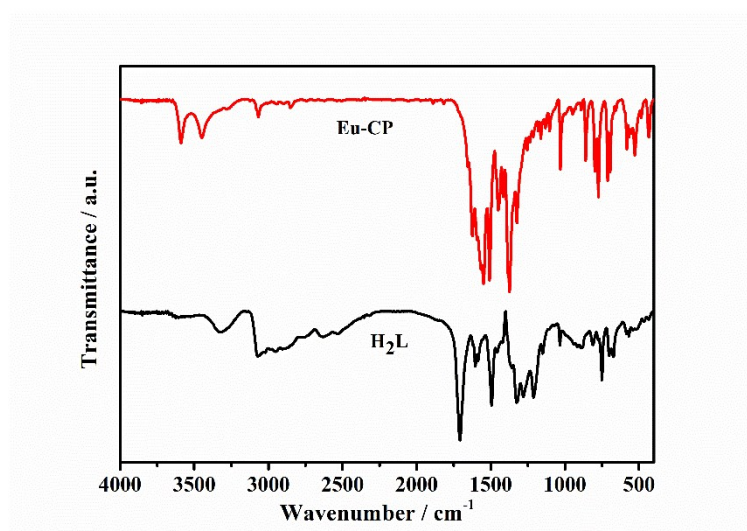

Fig. S5 IR spectrum of Eu-CP

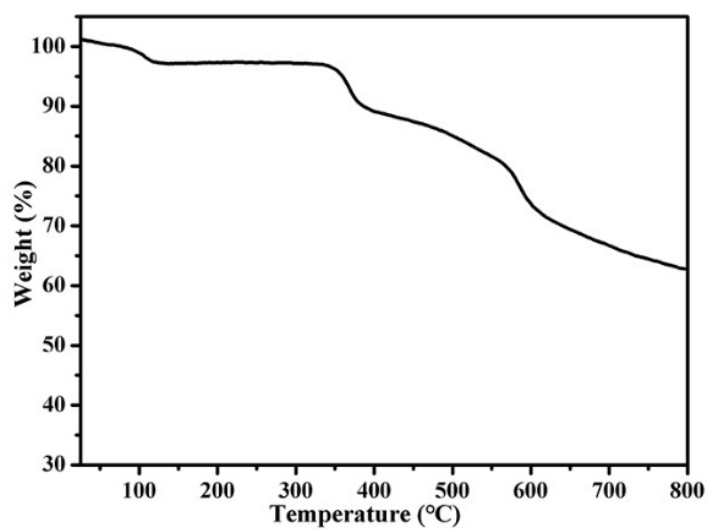

Fig. S6 TGA curve of Eu-CP

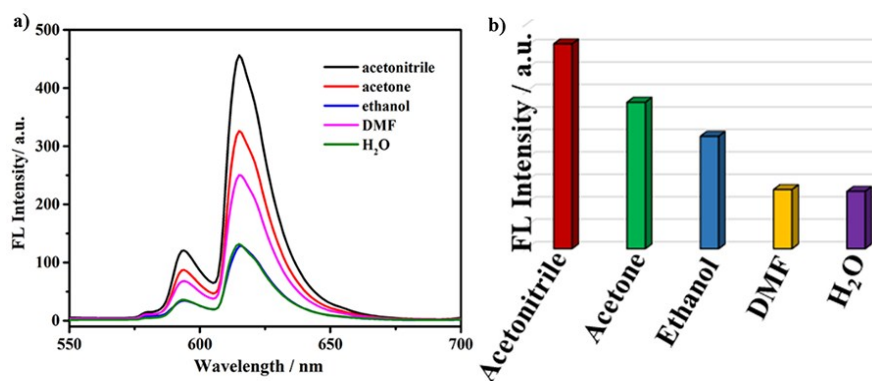

Fig. S7 Luminescence intensities at 615 nm of Eu-CP in different solvents

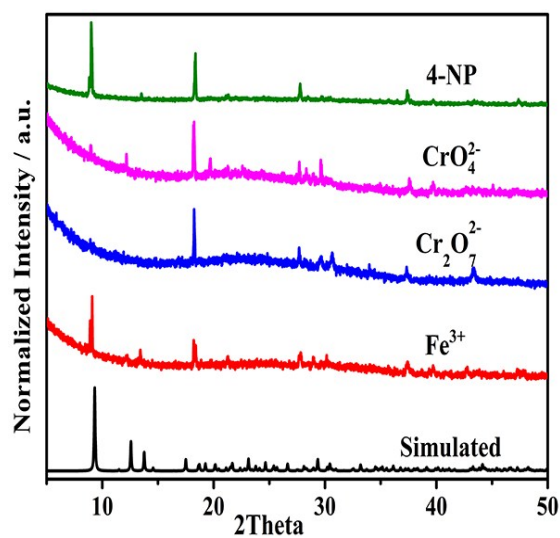

Fig. S8 PXRD patterns of Eu-CP in aqueous solutions of toxic substance

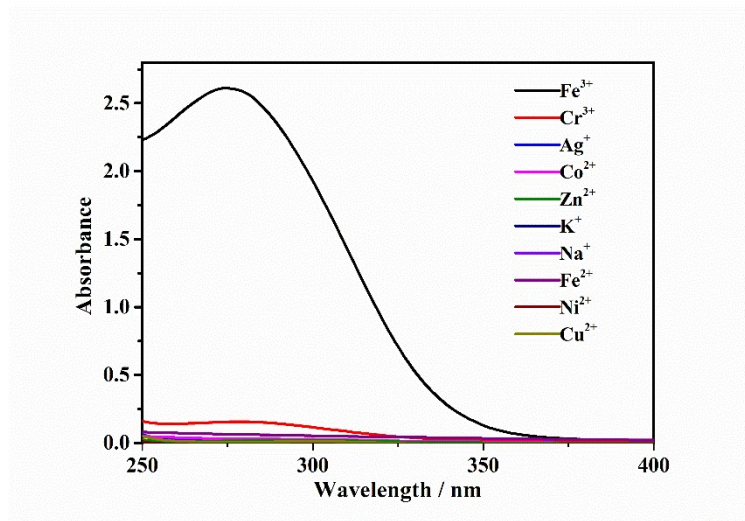

Fig. S9 UV-Vis spectra of different metal ions in aqueous solutions

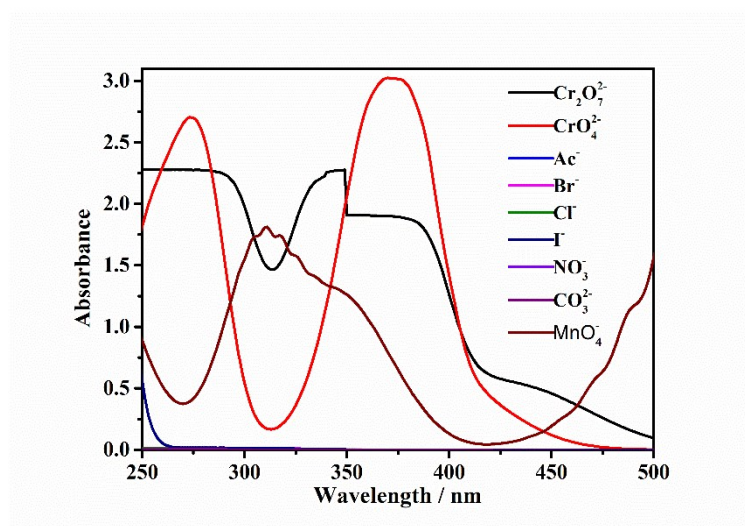

Fig. S10 UV-Vis spectra of different anions in aqueous solutions

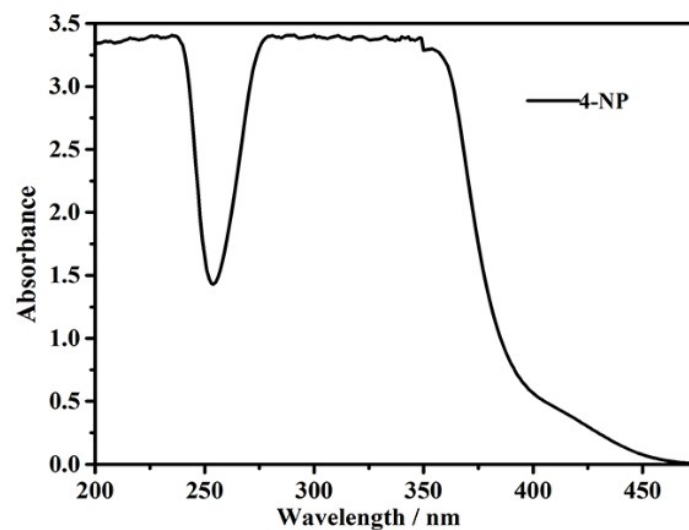

Fig. S11 UV-Vis spectra of 4-NP in aqueous solution

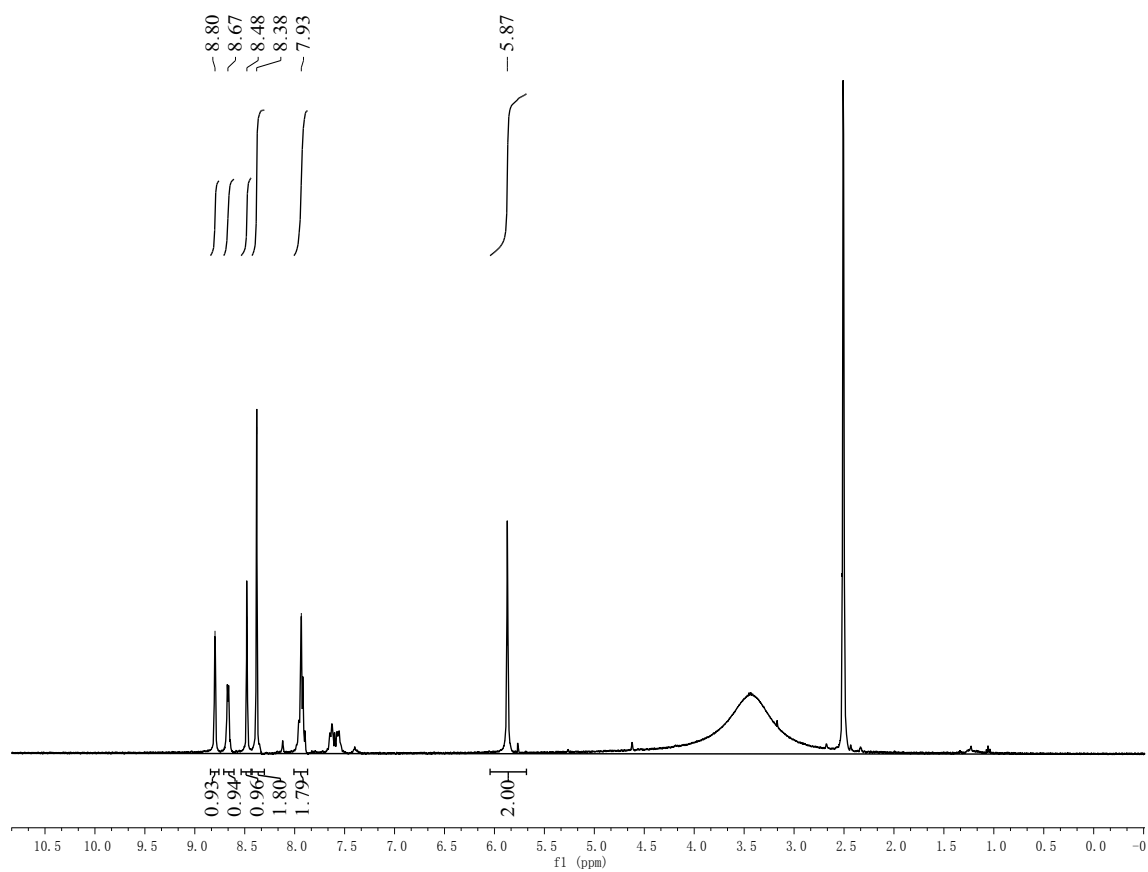

**Fig. S12** <sup>1</sup>H NMR spectrum of **3** in DMSO-d<sub>6</sub>

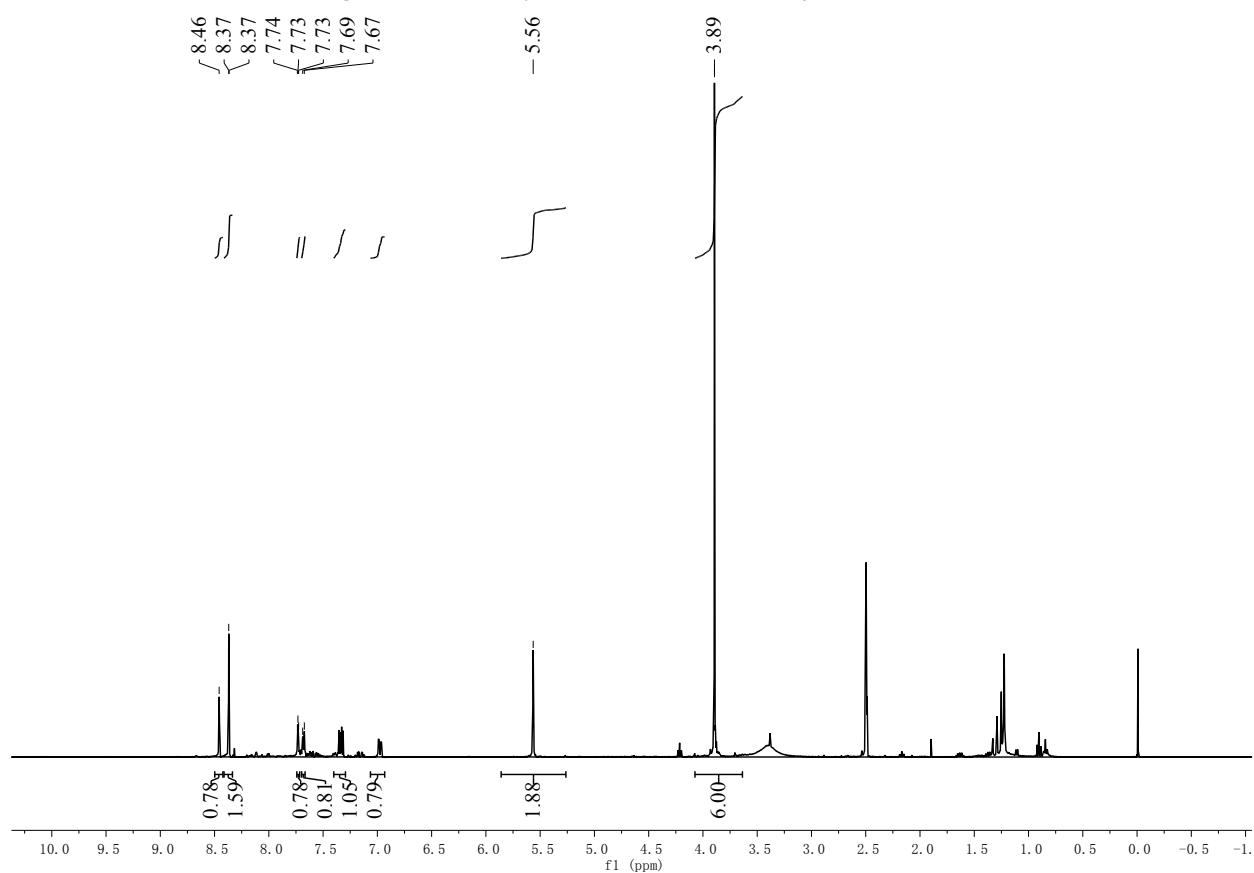

**Fig. S12** <sup>1</sup>H NMR spectrum of **H<sub>2</sub>L** in DMSO-d<sub>6</sub>



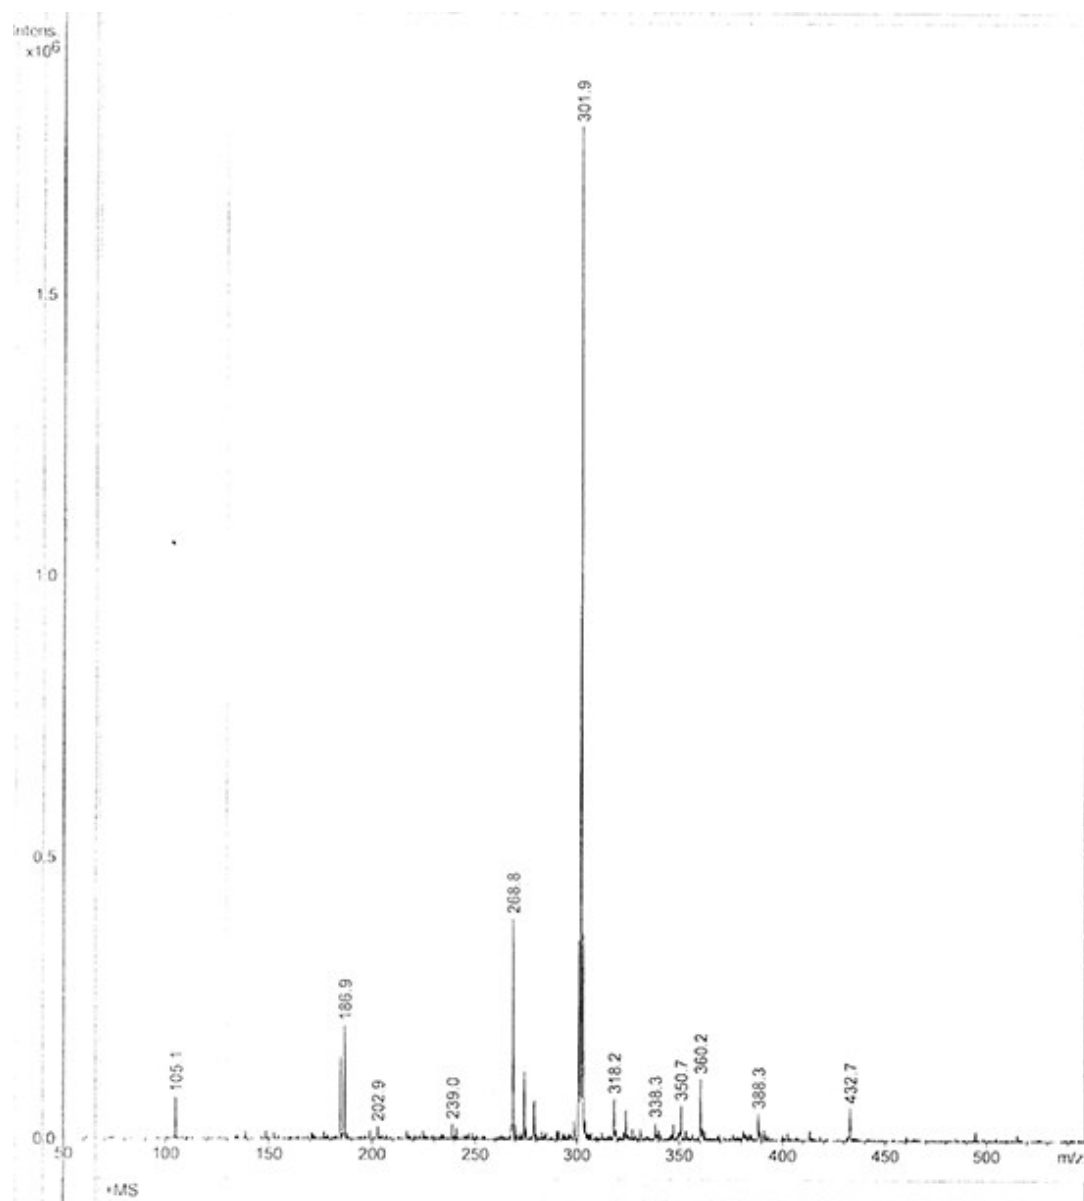

Fig. S13 ESI-MS of 3

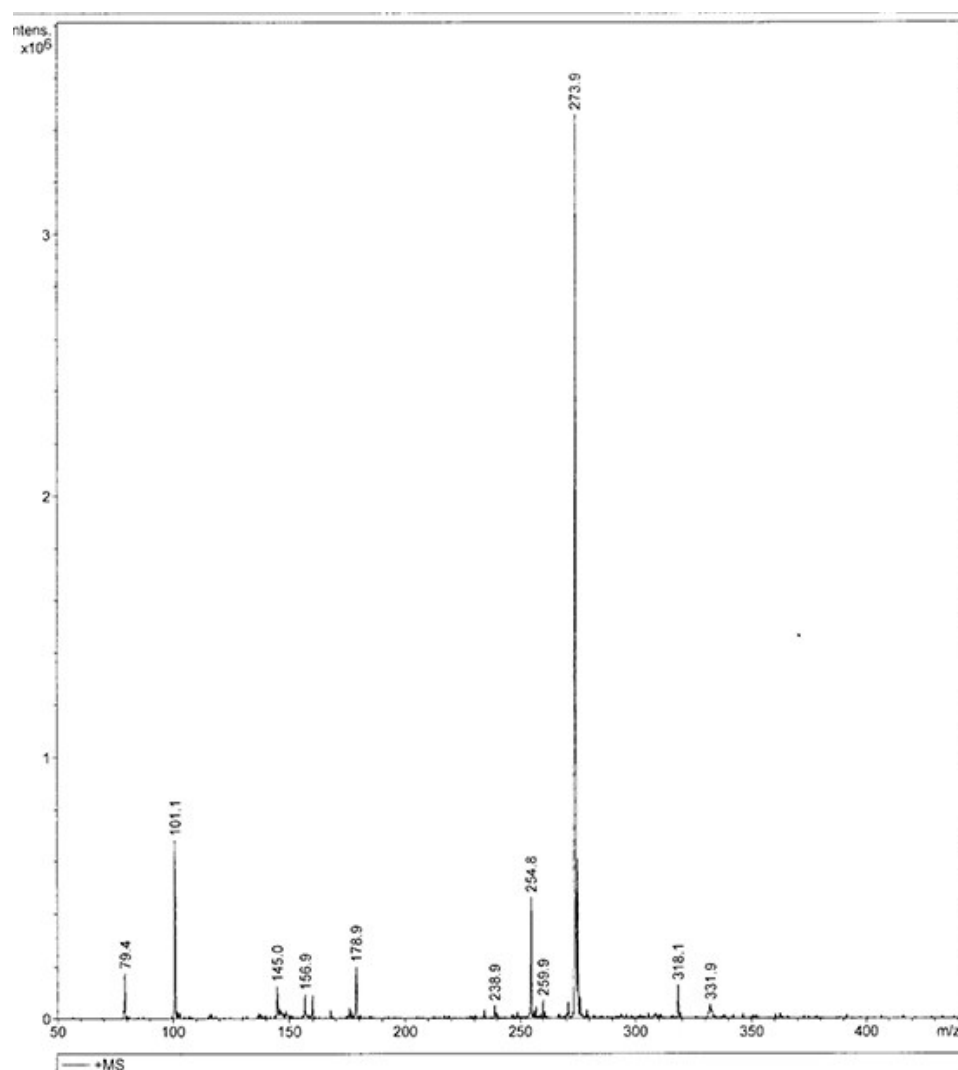

Fig. S14 ESI-MS of  $H_2L$
